# Supplementary material for: Vegetation responses to season of fire in an aseasonal, fire-prone fynbos shrubland
Source: PeerJ journal article supplement (doi:10.7717/peerj.3591), 2017-08-10

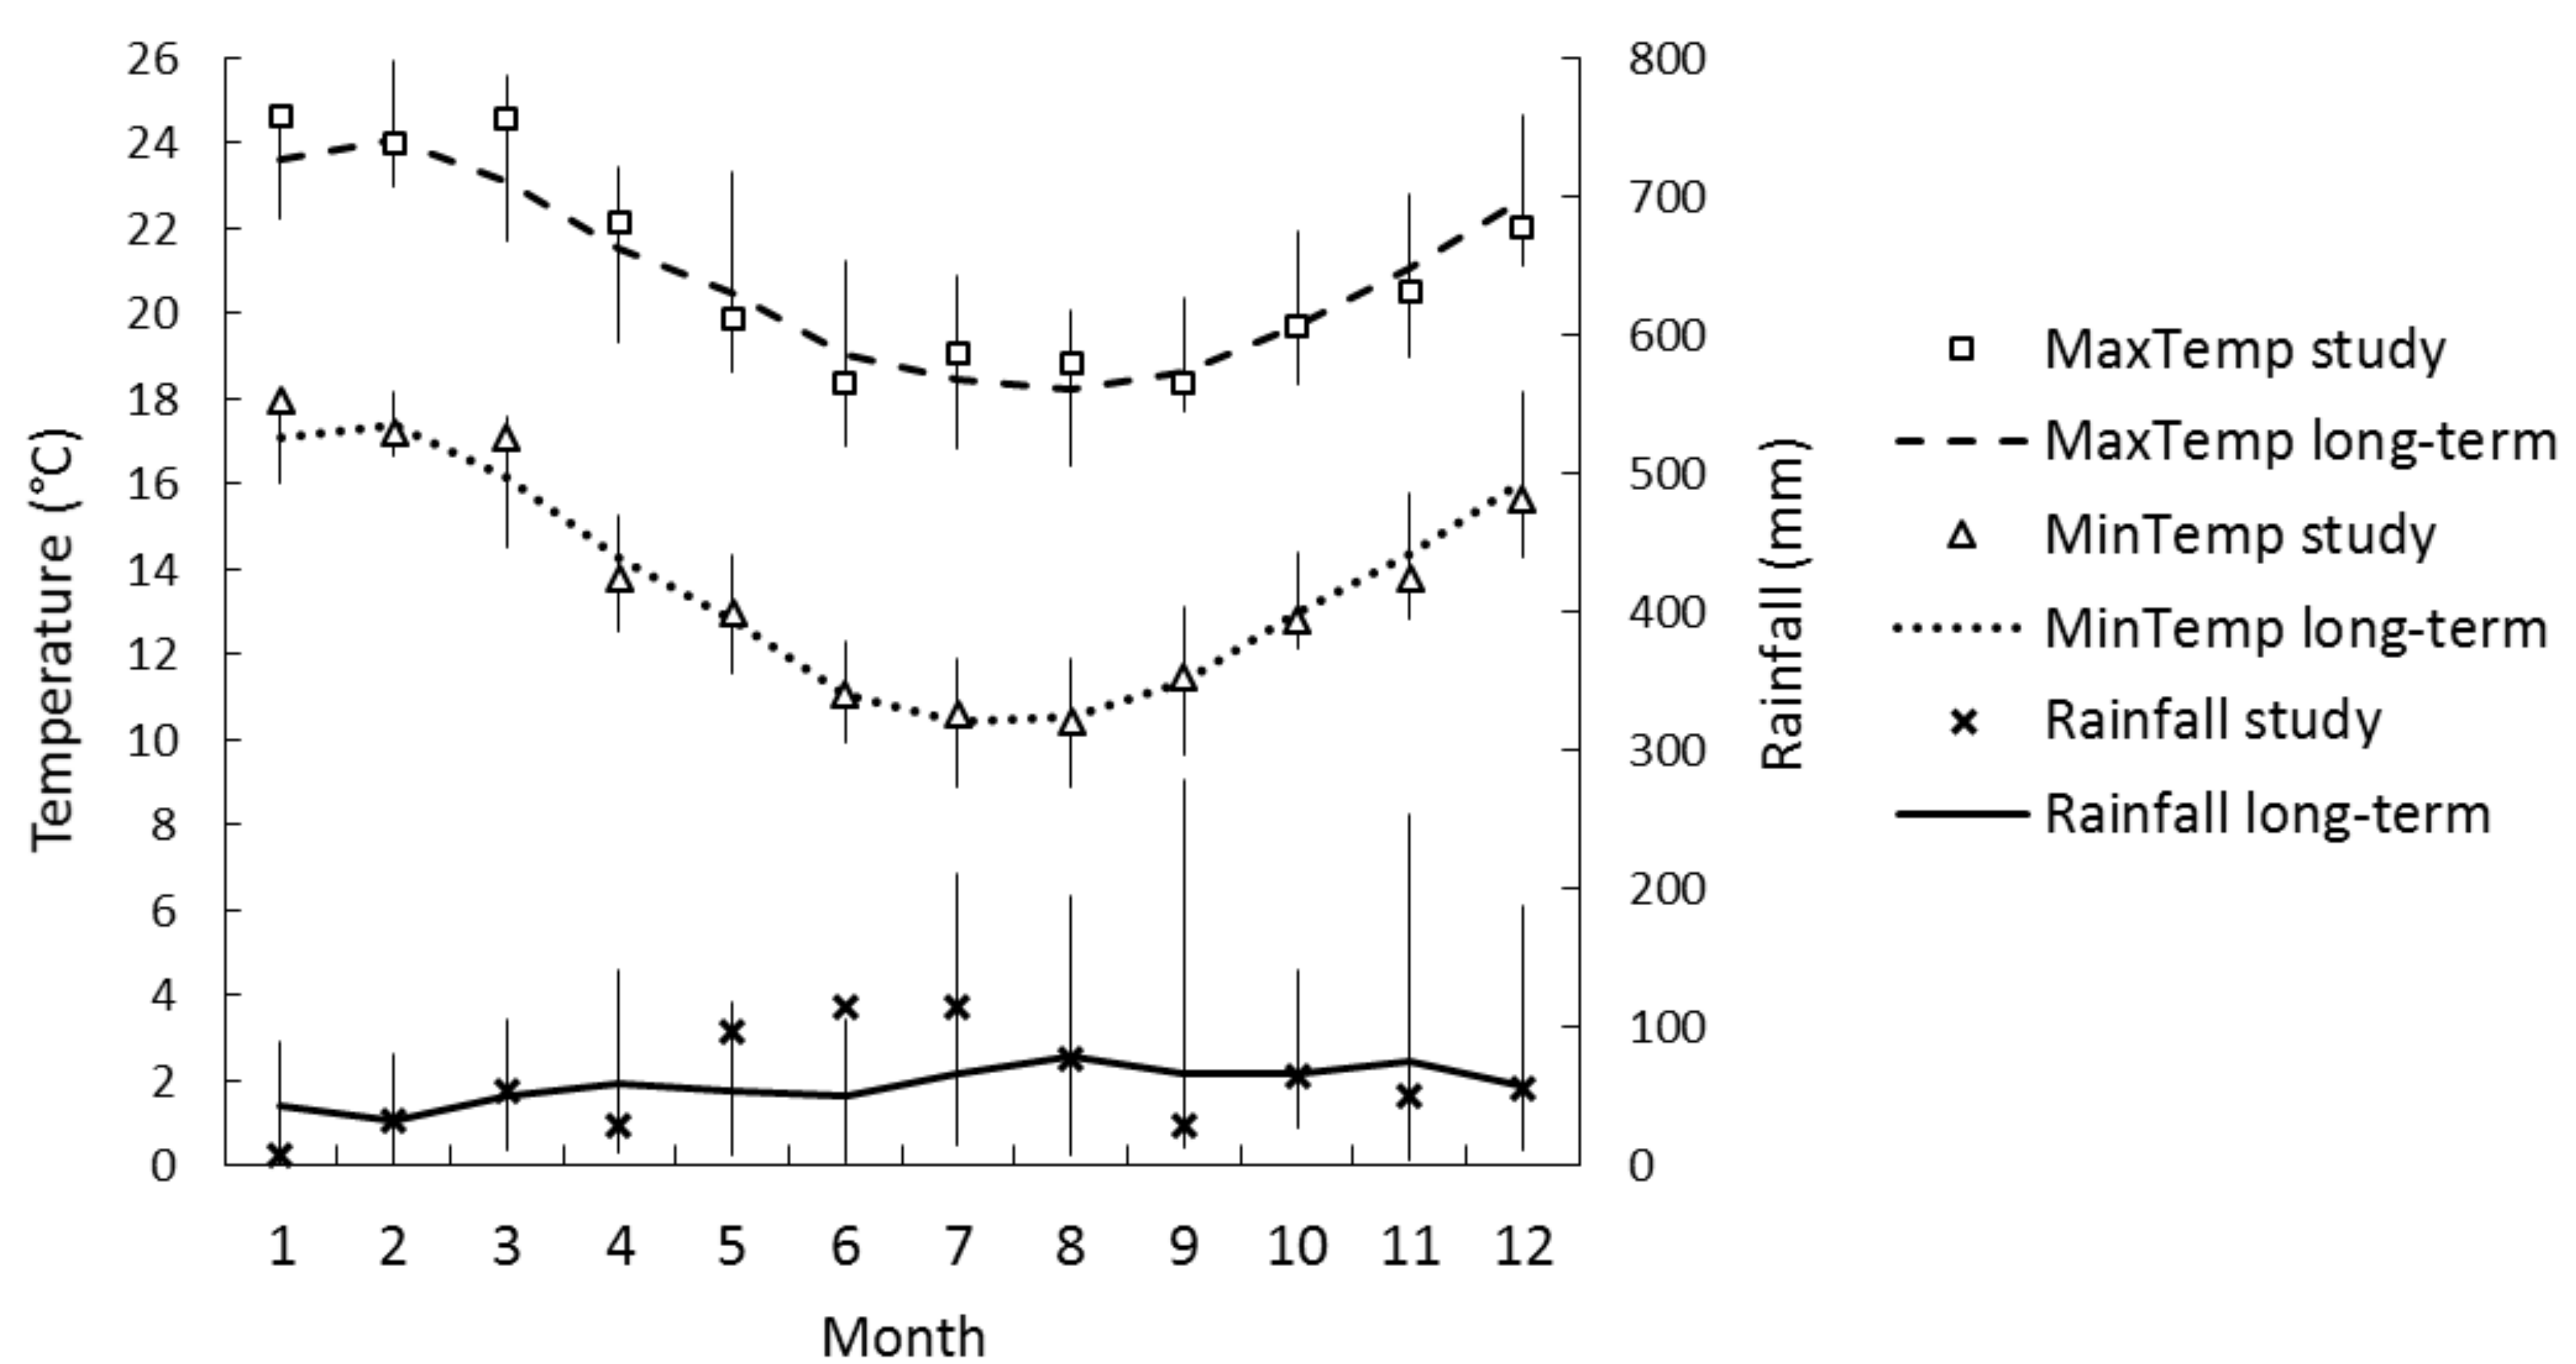

Supplement: FigS1.pdf [file FigS1.pdf]
